# Supplementary material for: Nitridation from core-shell oxides for tunable luminescence of BaSi2O2N2 : Eu2 + LED phosphors
Source: Royal Society of Chemistry journal article supplement (doi:10.1039/c0jm00118j), 2010-01-01
Supplement: c0jm00118j.pdf [file c0jm00118j.pdf]

## Nitridation from core-shell oxides for tunable luminescence of $\text{BaSi}_2\text{O}_2\text{N}_2:\text{Eu}^{2+}$ LED phosphors

Yunxin Gu,<sup>a</sup> Qinghong Zhang,<sup>a</sup> Yaogang Li<sup>\*b</sup> and Hongzhi Wang<sup>\*a</sup>

ELECTRONIC SUPPORTING INFORMATION

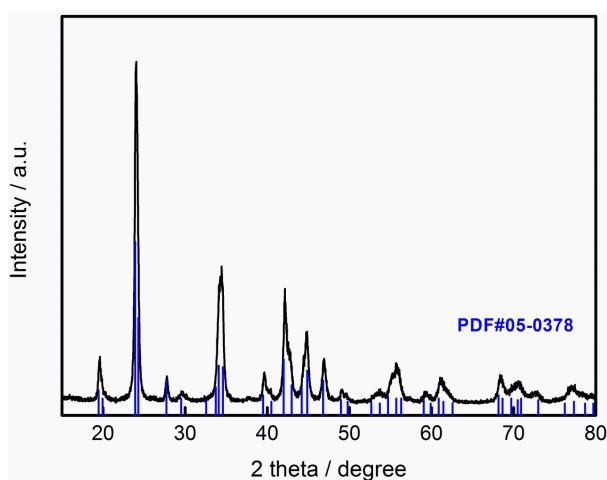

Fig. 1: XRD pattern of (Ba,Eu)CO<sub>3</sub> template.

Fig. 1 shows the XRD pattern of (Ba,Eu)CO<sub>3</sub> core. It can be observed that the sample is pure BaCO<sub>3</sub> with orthorhombic phase, and  $a=5.27591 \text{ \AA}$ ,  $b=8.94675 \text{ \AA}$ ,  $c=6.41931 \text{ \AA}$ ,  $V=303.01 \text{ \AA}^3$ .

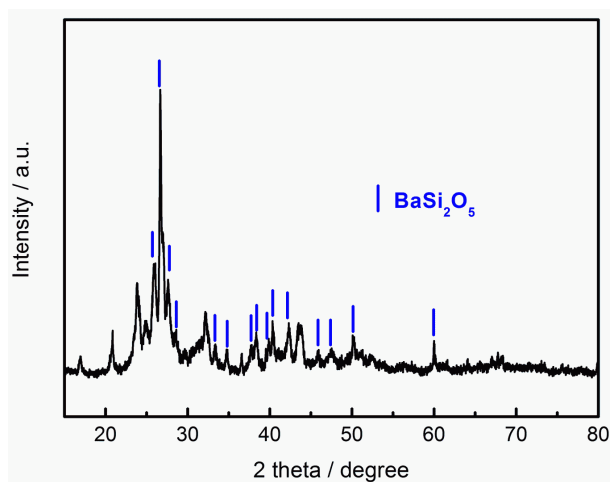

Fig. 2: XRD pattern of the core-shell sample treated at 800 °C in the TGA experiment.

Fig. 2 shows the XRD pattern of the core-shell sample treated after the TGA experiment. The TGA experiment was carried out from 30 °C to 800 °C with the heating rate of 10 °C/min. The main phase of the sample can be corresponded to  $\text{BaSi}_2\text{O}_5$ , and some of the impurity phases can be still observed, which may be attributed to the lack of holding time at 800 °C.

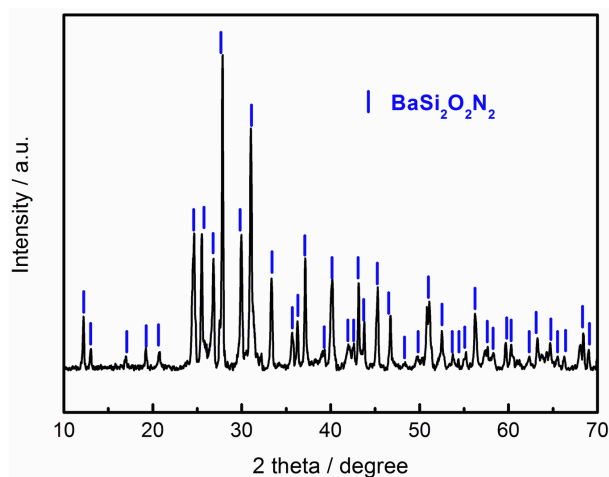

Fig. 3 XRD pattern of the sample prepared at 1300 °C from core-shell precursor.

Fig. 3 shows the XRD pattern of the sample prepared at 1300 °C from core-shell precursor. It can be observed that the sample is pure  $\text{BaSi}_2\text{O}_2\text{N}_2$  phase, and N content in the sample was calculated to be 11.87%.
